# Supplementary material
Source: MDPI journal article supplement (https://www.mdpi.com/2073-4395/12/5/1118)
Supplement: s1 [file s1]

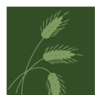

Supplementary Material **S1**. Soil nutrient status at the University of Fort Hare Crop Research Farm at initiation of trial.

| Sample      | Sample density<br>g/cm <sup>3</sup> | Org.<br>C | N   | Clay | P     | K        | Ca   | Mg   | Exch.<br>Acidity | Total<br>cations | Acid<br>sat.<br>% | pH<br>(KCl) | Zn    | Mn | Cu  |
|-------------|-------------------------------------|-----------|-----|------|-------|----------|------|------|------------------|------------------|-------------------|-------------|-------|----|-----|
|             |                                     | g/kg      |     |      | mg/kg | cmolc/kg |      |      |                  |                  |                   |             | mg/kg |    |     |
| NUE<br>2017 | 1.33                                | <5        | 0.6 | 120  | 39    | 0.99     | 5.60 | 2.29 | 0.07             | 8.91             | 1                 | 5.67        | 2.4   | 55 | 7.4 |

Org. C: Organic carbon, N: Nitrogen, P: Phosphorus, K: Potassium, Ca: Calcium, Mg: Magnesium, Exch. Acidity: Exchangeable acidity, Acid sat.: Acid saturation, Zn: Zinc, Mn: Manganese, Cu: Copper.

Supplementary Material S2. Performance of inbred lines for the estimated traits and indices across N levels.

| Inbred | REN    | PEN    | AE     | NUE  | NUpE | Bio<br>Total<br>N | G<br>Total<br>N | Yield | NUtE | HI   |
|--------|--------|--------|--------|------|------|-------------------|-----------------|-------|------|------|
| L1     | 0.001  | -35.09 | 23.83  | 0.07 | 0.06 | 1.60              | 1.77            | 4.00  | 1.19 | 0.22 |
| L2     | 0.004  | 7.76   | 44.96  | 0.13 | 0.06 | 1.64              | 1.75            | 7.34  | 2.16 | 0.25 |
| L3     | 0.001  | 19.80  | 30.91  | 0.12 | 0.06 | 1.65              | 1.75            | 6.28  | 1.85 | 0.21 |
| L4     | 0.003  | 7.40   | 27.47  | 0.12 | 0.06 | 1.66              | 1.74            | 6.54  | 1.92 | 0.28 |
| L5     | 0.002  | 2.96   | 29.60  | 0.10 | 0.06 | 1.60              | 1.75            | 5.41  | 1.65 | 0.30 |
| L6     | 0.002  | 2.93   | -6.45  | 0.08 | 0.06 | 1.56              | 1.74            | 4.91  | 1.52 | 0.28 |
| L7     | 0.004  | -9.70  | -19.71 | 0.05 | 0.06 | 1.60              | 1.65            | 3.01  | 0.96 | 0.18 |
| L8     | -0.002 | -7.04  | 41.04  | 0.11 | 0.06 | 1.60              | 1.77            | 6.30  | 1.86 | 0.28 |
| L9     | 0.005  | 5.55   | 37.32  | 0.11 | 0.06 | 1.56              | 1.66            | 6.57  | 2.02 | 0.34 |
| L10    | -0.016 | 1.80   | 43.90  | 0.11 | 0.06 | 1.82              | 1.71            | 5.98  | 1.73 | 0.26 |
| L11    | -0.001 | 20.54  | 59.07  | 0.11 | 0.06 | 1.58              | 1.68            | 6.04  | 1.84 | 0.28 |
| L12    | -0.001 | 4.44   | 63.70  | 0.11 | 0.06 | 1.57              | 1.75            | 5.73  | 1.73 | 0.30 |
| L13    | 0.001  | 7.70   | 72.36  | 0.11 | 0.06 | 1.62              | 1.77            | 5.68  | 1.65 | 0.29 |
| L14    | 0.003  | 13.30  | 21.51  | 0.10 | 0.06 | 1.55              | 1.67            | 6.23  | 1.92 | 0.32 |
| L15    | 0.000  | 3.54   | 30.79  | 0.08 | 0.06 | 1.60              | 1.60            | 4.05  | 1.26 | 0.23 |
| L16    | -0.001 | -2.99  | 56.01  | 0.11 | 0.05 | 1.59              | 1.62            | 5.77  | 1.80 | 0.28 |
| L17    | 0.003  | 3.00   | 62.64  | 0.11 | 0.06 | 1.61              | 1.76            | 5.34  | 1.58 | 0.26 |
| L18    | 0.000  | 29.55  | 38.77  | 0.09 | 0.06 | 1.63              | 1.64            | 5.12  | 1.57 | 0.22 |
| L19    | -0.003 | 6.77   | 46.57  | 0.10 | 0.06 | 1.55              | 1.83            | 5.08  | 1.52 | 0.27 |
| L20    | 0.004  | 2.37   | 37.01  | 0.11 | 0.06 | 1.62              | 1.75            | 6.04  | 1.81 | 0.26 |
| L21    | 0.003  | 6.24   | 50.70  | 0.08 | 0.06 | 1.59              | 1.78            | 4.97  | 1.43 | 0.24 |
| L22    | 0.002  | 4.02   | 33.51  | 0.11 | 0.06 | 1.60              | 1.70            | 6.15  | 1.86 | 0.21 |
| L23    | 0.006  | 1.23   | 1.52   | 0.10 | 0.06 | 1.55              | 1.77            | 6.20  | 1.88 | 0.34 |
| L24    | -0.001 | 3.63   | 23.20  | 0.10 | 0.06 | 1.61              | 1.65            | 5.30  | 1.63 | 0.25 |
| L25    | 0.002  | 2.85   | 17.84  | 0.12 | 0.06 | 1.65              | 1.70            | 6.68  | 2.00 | 0.35 |
| L26    | 0.001  | 8.81   | 8.07   | 0.11 | 0.06 | 1.59              | 1.80            | 6.10  | 1.81 | 0.23 |
| L27    | 0.001  | -16.62 | 19.53  | 0.08 | 0.06 | 1.58              | 1.73            | 4.21  | 1.31 | 0.27 |
| L28    | 0.001  | -8.24  | 20.72  | 0.12 | 0.05 | 1.61              | 1.77            | 6.80  | 2.04 | 0.28 |
| L29    | -0.005 | -6.69  | 22.27  | 0.12 | 0.06 | 1.62              | 1.78            | 6.72  | 2.01 | 0.32 |
| L30    | -0.002 | -6.20  | 62.56  | 0.11 | 0.06 | 1.68              | 1.81            | 5.61  | 1.62 | 0.35 |
| L31    | -0.001 | -12.36 | -6.45  | 0.09 | 0.06 | 1.66              | 1.74            | 5.30  | 1.58 | 0.22 |
| L32    | 0.003  | 2.99   | 16.52  | 0.11 | 0.06 | 1.67              | 1.81            | 6.38  | 1.84 | 0.34 |

REN: crop recovery efficiency of applied N (kg N-uptake/kg N fertilizer); PEN: physiological efficiency of applied N (kg grain/kg N-uptake); AE: agronomic efficiency (kg grain/kg N-fertilizer); NUE: nitrogen use efficiency (kg grain/kg N-fertilizer); NUpE: total amount of N in the mature plant, divided by the amount of N applied to soil (kg.ha<sup>-1</sup>); NUtE: ratio between grain weight and the total amount of N in the mature plant i.e. kg grain/ total N in dry matter of above ground mature plant; HI: harvest index; Bio Total N: total nitrogen in biomass; G Total N: total nitrogen in grain.

Supplementary Material S3. Yield performance and ranking of QPM genotypes at different levels of nitrogen application.

| Inbred      | Yield 0 kg N<br>ha <sup>-1</sup> (*) | Yield 30 kg<br>N ha <sup>-1</sup> | Yield 60 kg<br>N ha <sup>-1</sup> | Yield 90 kg<br>N ha <sup>-1</sup> | Yield 120 kg<br>N ha <sup>-1</sup> |
|-------------|--------------------------------------|-----------------------------------|-----------------------------------|-----------------------------------|------------------------------------|
| L1          | 2.86 (26)                            | 3.99 (30)                         | 4.39 (29)                         | 5.41 (27)                         | 3.36 (29)                          |
| L2          | 4.85 (11)                            | 6.24 (3)                          | 8.36 (3)                          | 9.09 (1)                          | 8.18 (2)                           |
| L3          | 4.87 (10)                            | 6.47 (1)                          | 6.81 (13)                         | 8.07 (5)                          | 5.19 (22)                          |
| L4          | 5.08 (8)                             | 6.34 (2)                          | 6.48 (16)                         | 7.29 (13)                         | 7.49 (8)                           |
| L5          | 4.14 (17)                            | 5.78 (14)                         | 6.3 (19)                          | 6.51 (19)                         | 4.34 (27)                          |
| L6          | 5.06 (9)                             | 4.17 (29)                         | 5.19 (24)                         | 5.53 (25)                         | 4.62 (25)                          |
| L7          | 4.1 (18)                             | 3.39 (31)                         | 2.43 (32)                         | 3.36 (32)                         | 1.79 (32)                          |
| L8          | 3.97 (19)                            | 4.95 (25)                         | 7.46 (7)                          | 8.96 (2)                          | 6.17 (16)                          |
| L9          | 4.47 (13)                            | 5.65 (18)                         | 7.30 (9)                          | 7.50 (9)                          | 7.92 (4)                           |
| L10         | 3.72 (20)                            | 5.58 (19)                         | 7.37 (8)                          | 5.33 (28)                         | 7.90 (5)                           |
| L11         | 3.07 (24)                            | 5.79 (13)                         | 7.13 (11)                         | 6.93 (16)                         | 7.27 (11)                          |
| L12         | 2.72 (27)                            | 5.80 (12)                         | 7.00 (12)                         | 8.69 (3)                          | 4.44 (26)                          |
| L13         | 2.02 (31)                            | 6.08 (6)                          | 4.3 (30)                          | 7.88 (7)                          | 8.10 (3)                           |
| L14         | 4.74 (12)                            | 4.78 (27)                         | 6.64 (15)                         | 7.38 (11)                         | 7.60 (6)                           |
| L15         | 2.66 (28)                            | 4.21 (28)                         | 5.00 (26)                         | 5.31 (29)                         | 3.05 (30)                          |
| L16         | 3.19 (22)                            | 5.66 (17)                         | 8.47 (2)                          | 7.23 (14)                         | 4.28 (28)                          |
| L17         | 2.46 (30)                            | 5.93 (8)                          | 6.68 (14)                         | 5.46 (26)                         | 6.18 (15)                          |
| L18         | 3.15 (23)                            | 5.02 (24)                         | 5.15 (25)                         | 6.55 (18)                         | 5.72 (18)                          |
| L19         | 3.00 (25)                            | 5.36 (23)                         | 7.25 (10)                         | 4.80 (30)                         | 5.00 (23)                          |
| L20         | 4.39 (15)                            | 6.17 (4)                          | 7.6 (6)                           | 7.36 (12)                         | 4.67 (24)                          |
| L21         | 1.83 (32)                            | 3.05 (32)                         | 4.94 (28)                         | 7.47 (10)                         | 7.54 (7)                           |
| L22         | 4.43 (14)                            | 5.88 (11)                         | 6.16 (20)                         | 8.55 (4)                          | 5.74 (17)                          |
| L23         | 5.84 (1)                             | 5.42 (21)                         | 5.69 (23)                         | 6.77 (17)                         | 7.31 (10)                          |
| L24         | 4.16 (16)                            | 5.48 (20)                         | 4.95 (27)                         | 6.35 (21)                         | 5.54 (20)                          |
| L25         | 5.62 (5)                             | 5.76 (16)                         | 8.27 (4)                          | 6.33 (22)                         | 7.40 (9)                           |
| L26         | 5.66 (4)                             | 5.91 (9)                          | 6.35 (17)                         | 6.35 (20)                         | 6.22 (14)                          |
| L27         | 3.47 (21)                            | 4.89 (26)                         | 4.11 (31)                         | 5.80 (24)                         | 2.75 (31)                          |
| L28         | 5.66 (3)                             | 6.17 (5)                          | 7.84 (5)                          | 7.23 (15)                         | 7.09 (12)                          |
| L29         | 5.59 (6)                             | 6.03 (7)                          | 8.48 (1)                          | 7.95 (6)                          | 5.56 (19)                          |
| L30         | 2.57 (29)                            | 5.89 (10)                         | 5.73 (22)                         | 7.63 (8)                          | 6.24 (13)                          |
| L31         | 5.68 (2)                             | 5.4 (22)                          | 5.81 (21)                         | 4.23 (31)                         | 5.41 (21)                          |
| L32         | 5.32 (7)                             | 5.77 (15)                         | 6.33 (18)                         | 6.27 (23)                         | 8.19 (1)                           |
| <b>Mean</b> | 4.07                                 | 5.41                              | 6.31                              | 6.74                              | 5.88                               |

(\*): rank in brackets

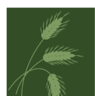

Supplementary Material S4. NUE and NUE indices of inbred lines at 90 kg N ha<sup>-1</sup> and 120 kg N ha<sup>-1</sup>.

| Inbred line | REN 120<br>kg N ha <sup>-1</sup> | PEN<br>120 kg N ha <sup>-1</sup> | AE 120 kg<br>N ha <sup>-1</sup> | NUE<br>120 kg N<br>ha <sup>-1</sup> | NUPE<br>120 kg N<br>ha <sup>-1</sup> | REN 90 kg<br>N ha <sup>-1</sup> | PEN 90 kg<br>N ha <sup>-1</sup> | AE 90 kg N<br>ha <sup>-1</sup> | NUE 90<br>kg N ha <sup>-1</sup> | NUPE 90<br>kg N ha <sup>-1</sup> |
|-------------|----------------------------------|----------------------------------|---------------------------------|-------------------------------------|--------------------------------------|---------------------------------|---------------------------------|--------------------------------|---------------------------------|----------------------------------|
| L1          | 0.003                            | -130.79                          | 4.16                            | 0.03                                | 0.03                                 | 0.002                           | -5.65                           | 28.29                          | 0.06                            | 0.04                             |
| L10         | -0.006                           | 1.79                             | 34.83                           | 0.07                                | 0.03                                 | -0.010                          | 2.12                            | 17.94                          | 0.06                            | 0.04                             |
| L11         | 0.002                            | 58.05                            | 34.96                           | 0.06                                | 0.03                                 | 0.001                           | 21.60                           | 42.90                          | 0.08                            | 0.04                             |
| L12         | 0.002                            | 5.26                             | 14.38                           | 0.04                                | 0.03                                 | 0.002                           | 42.66                           | 66.38                          | 0.10                            | 0.04                             |
| L13         | 0.003                            | 13.25                            | 50.68                           | 0.07                                | 0.03                                 | 0.002                           | 17.91                           | 65.17                          | 0.09                            | 0.04                             |
| L14         | 0.005                            | 3.56                             | 23.87                           | 0.06                                | 0.03                                 | 0.003                           | 4.62                            | 29.31                          | 0.08                            | 0.04                             |
| L15         | 0.001                            | 4.63                             | 3.24                            | 0.03                                | 0.03                                 | 0.004                           | 4.84                            | 29.38                          | 0.06                            | 0.04                             |
| L16         | 0.002                            | 4.51                             | 9.07                            | 0.04                                | 0.03                                 | 0.001                           | 20.10                           | 44.89                          | 0.08                            | 0.04                             |
| L17         | 0.004                            | 4.30                             | 31.03                           | 0.05                                | 0.03                                 | 0.002                           | 14.01                           | 33.33                          | 0.06                            | 0.04                             |
| L18         | 0.003                            | 35.57                            | 21.44                           | 0.05                                | 0.03                                 | 0.001                           | 26.71                           | 37.80                          | 0.07                            | 0.04                             |
| L19         | 0.002                            | 6.20                             | 16.71                           | 0.04                                | 0.03                                 | 0.000                           | 27.47                           | 20.00                          | 0.05                            | 0.04                             |
| L2          | 0.004                            | 4.40                             | 27.73                           | 0.07                                | 0.03                                 | 0.004                           | 7.22                            | 47.08                          | 0.10                            | 0.04                             |
| L20         | 0.006                            | 0.42                             | 2.27                            | 0.04                                | 0.03                                 | 0.004                           | 5.55                            | 32.91                          | 0.08                            | 0.04                             |
| L21         | 0.004                            | 9.49                             | 47.58                           | 0.06                                | 0.03                                 | 0.004                           | 10.67                           | 62.71                          | 0.08                            | 0.04                             |
| L22         | 0.004                            | 2.36                             | 10.96                           | 0.05                                | 0.03                                 | 0.004                           | 6.39                            | 45.78                          | 0.09                            | 0.04                             |
| L23         | 0.005                            | 1.79                             | 12.24                           | 0.06                                | 0.03                                 | 0.003                           | 1.70                            | 10.32                          | 0.08                            | 0.04                             |
| L24         | 0.001                            | 7.06                             | 11.45                           | 0.05                                | 0.03                                 | 0.003                           | 4.96                            | 24.33                          | 0.07                            | 0.04                             |
| L25         | 0.002                            | 5.33                             | 14.85                           | 0.06                                | 0.03                                 | 0.003                           | 2.88                            | 7.85                           | 0.07                            | 0.04                             |
| L26         | 0.002                            | 1.72                             | 4.64                            | 0.05                                | 0.03                                 | 0.004                           | 1.60                            | 7.66                           | 0.07                            | 0.04                             |
| L27         | 0.002                            | -2.88                            | -5.94                           | 0.02                                | 0.03                                 | 0.003                           | -23.81                          | 25.93                          | 0.06                            | 0.04                             |
| L28         | 0.007                            | 1.31                             | 11.90                           | 0.06                                | 0.04                                 | 0.004                           | 4.15                            | 17.42                          | 0.08                            | 0.04                             |
| L29         | 0.001                            | 1.99                             | -0.23                           | 0.05                                | 0.03                                 | -0.002                          | -8.60                           | 26.23                          | 0.09                            | 0.04                             |
| L3          | 0.002                            | 2.95                             | 2.61                            | 0.04                                | 0.03                                 | 0.003                           | 8.13                            | 35.54                          | 0.09                            | 0.04                             |
| L30         | 0.002                            | 10.65                            | 30.58                           | 0.05                                | 0.03                                 | -0.002                          | 2.53                            | 56.23                          | 0.08                            | 0.04                             |

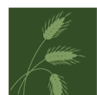

|            |       |       |        |      |      |       |        |        |      |      |
|------------|-------|-------|--------|------|------|-------|--------|--------|------|------|
| <b>L31</b> | 0.000 | -0.73 | -2.25  | 0.05 | 0.03 | 0.001 | -24.88 | -16.17 | 0.05 | 0.04 |
| <b>L32</b> | 0.004 | 4.35  | 23.90  | 0.07 | 0.03 | 0.002 | 3.02   | 10.54  | 0.07 | 0.04 |
| <b>L4</b>  | 0.004 | 4.65  | 20.07  | 0.06 | 0.03 | 0.005 | 4.31   | 24.58  | 0.08 | 0.04 |
| <b>L5</b>  | 0.005 | 0.13  | 1.63   | 0.04 | 0.03 | 0.004 | 6.61   | 26.28  | 0.07 | 0.04 |
| <b>L6</b>  | 0.003 | -0.37 | -3.65  | 0.04 | 0.03 | 0.000 | 10.62  | 5.33   | 0.06 | 0.03 |
| <b>L7</b>  | 0.005 | -2.33 | -19.25 | 0.01 | 0.03 | 0.004 | -0.44  | -8.16  | 0.04 | 0.04 |
| <b>L8</b>  | 0.001 | 11.97 | 18.26  | 0.05 | 0.03 | 0.000 | -15.70 | 55.39  | 0.10 | 0.04 |
| <b>L9</b>  | 0.006 | 3.39  | 28.81  | 0.07 | 0.03 | 0.003 | 10.55  | 33.73  | 0.08 | 0.03 |

Supplementary Material S5. NUE and NUE indices of inbred lines at 30 kg N ha<sup>-1</sup> and 60 kg N ha<sup>-1</sup>.

| <b>Inbred line</b> | <b>REN 60 kg N ha<sup>-1</sup></b> | <b>PEN 60 kg N ha<sup>-1</sup></b> | <b>AE 60 kg N ha<sup>-1</sup></b> | <b>NUE 60 kg N ha<sup>-1</sup></b> | <b>NUpe 60 kg N ha<sup>-1</sup></b> | <b>REN 30 kg N ha<sup>-1</sup></b> | <b>PEN 30 kg N ha<sup>-1</sup></b> | <b>AE 30 kg N ha<sup>-1</sup></b> | <b>NUE 30 kg N ha<sup>-1</sup></b> | <b>NUpe 30 kg N ha<sup>-1</sup></b> |
|--------------------|------------------------------------|------------------------------------|-----------------------------------|------------------------------------|-------------------------------------|------------------------------------|------------------------------------|-----------------------------------|------------------------------------|-------------------------------------|
| <b>L1</b>          | 0.003                              | 2.29                               | 25.38                             | 0.07                               | 0.06                                | -0.004                             | -6.20                              | 37                                | 0.13                               | 0.10                                |
| <b>L10</b>         | -0.016                             | 1.03                               | 60.89                             | 0.12                               | 0.06                                | -0.032                             | 2.24                               | 62                                | 0.19                               | 0.11                                |
| <b>L11</b>         | -0.003                             | -0.93                              | 67.68                             | 0.12                               | 0.05                                | -0.004                             | 3.46                               | 91                                | 0.19                               | 0.10                                |
| <b>L12</b>         | -0.002                             | -3.38                              | 71.38                             | 0.12                               | 0.05                                | -0.004                             | -26.76                             | 103                               | 0.19                               | 0.10                                |
| <b>L13</b>         | -0.003                             | -0.38                              | 38.11                             | 0.07                               | 0.05                                | 0.001                              | 0.03                               | 135                               | 0.20                               | 0.11                                |
| <b>L14</b>         | 0.006                              | 3.31                               | 31.61                             | 0.11                               | 0.06                                | -0.001                             | 41.73                              | 1                                 | 0.16                               | 0.10                                |
| <b>L15</b>         | 0.002                              | 5.76                               | 38.89                             | 0.08                               | 0.05                                | -0.006                             | -1.08                              | 52                                | 0.14                               | 0.10                                |
| <b>L16</b>         | -0.001                             | -25.80                             | 87.91                             | 0.14                               | 0.05                                | -0.008                             | -10.76                             | 82                                | 0.19                               | 0.09                                |
| <b>L17</b>         | 0.001                              | 36.88                              | 70.43                             | 0.11                               | 0.05                                | 0.003                              | -43.18                             | 116                               | 0.20                               | 0.11                                |
| <b>L18</b>         | -0.002                             | 14.36                              | 33.40                             | 0.09                               | 0.05                                | -0.002                             | 41.54                              | 62                                | 0.17                               | 0.10                                |
| <b>L19</b>         | -0.003                             | 4.02                               | 70.86                             | 0.12                               | 0.05                                | -0.012                             | -10.61                             | 79                                | 0.18                               | 0.10                                |
| <b>L2</b>          | 0.004                              | 12.15                              | 58.60                             | 0.14                               | 0.05                                | 0.006                              | 7.28                               | 46                                | 0.21                               | 0.11                                |



|            |        |        |        |      |      |        |        |     |      |      |
|------------|--------|--------|--------|------|------|--------|--------|-----|------|------|
| <b>L20</b> | 0.007  | 6.00   | 53.52  | 0.13 | 0.06 | -0.001 | -2.48  | 59  | 0.21 | 0.10 |
| <b>L21</b> | 0.003  | 12.32  | 51.86  | 0.08 | 0.06 | 0.002  | -7.52  | 41  | 0.10 | 0.11 |
| <b>L22</b> | 0.004  | 6.25   | 28.86  | 0.10 | 0.06 | -0.002 | 1.09   | 48  | 0.20 | 0.10 |
| <b>L23</b> | 0.007  | -0.78  | -2.52  | 0.09 | 0.06 | 0.009  | 2.20   | -14 | 0.18 | 0.11 |
| <b>L24</b> | 0.004  | 5.86   | 13.18  | 0.08 | 0.06 | -0.010 | -3.35  | 44  | 0.18 | 0.10 |
| <b>L25</b> | 0.006  | 8.52   | 44.07  | 0.14 | 0.06 | -0.003 | -5.33  | 5   | 0.19 | 0.10 |
| <b>L26</b> | 0.001  | 32.92  | 11.53  | 0.11 | 0.06 | -0.004 | -1.01  | 8   | 0.20 | 0.10 |
| <b>L27</b> | 0.004  | 8.23   | 10.79  | 0.07 | 0.06 | -0.005 | -48.04 | 47  | 0.16 | 0.09 |
| <b>L28</b> | 0.000  | -36.50 | 36.44  | 0.13 | 0.05 | -0.005 | -1.91  | 17  | 0.21 | 0.09 |
| <b>L29</b> | -0.004 | -19.46 | 48.29  | 0.14 | 0.06 | -0.015 | -0.69  | 15  | 0.20 | 0.09 |
| <b>L3</b>  | 0.000  | 75.71  | 32.30  | 0.11 | 0.05 | -0.001 | -7.61  | 53  | 0.22 | 0.11 |
| <b>L30</b> | -0.002 | -29.52 | 52.70  | 0.10 | 0.06 | -0.008 | -8.47  | 111 | 0.20 | 0.10 |
| <b>L31</b> | 0.000  | -29.47 | 2.14   | 0.10 | 0.06 | -0.007 | 5.63   | -10 | 0.18 | 0.10 |
| <b>L32</b> | 0.006  | 1.94   | 16.75  | 0.11 | 0.06 | 0.000  | 2.65   | 15  | 0.19 | 0.10 |
| <b>L4</b>  | 0.002  | 10.52  | 23.24  | 0.11 | 0.05 | 0.004  | 10.12  | 42  | 0.21 | 0.11 |
| <b>L5</b>  | 0.003  | 12.29  | 35.92  | 0.10 | 0.05 | -0.003 | -7.19  | 55  | 0.19 | 0.10 |
| <b>L6</b>  | 0.003  | 0.50   | 2.17   | 0.09 | 0.06 | 0.001  | 0.97   | -30 | 0.14 | 0.10 |
| <b>L7</b>  | 0.006  | -3.08  | -27.82 | 0.04 | 0.06 | 0.002  | -32.95 | -24 | 0.11 | 0.10 |
| <b>L8</b>  | 0.000  | -16.69 | 58.15  | 0.12 | 0.06 | -0.008 | -7.75  | 32  | 0.16 | 0.10 |
| <b>L9</b>  | 0.006  | 4.24   | 47.23  | 0.12 | 0.06 | 0.006  | 4.02   | 39  | 0.19 | 0.10 |
